# Supplementary material for: Disease modification and symptom relief in osteoarthritis using a mutated GCP‐2/CXCL6 chemokine
Source: PubMed Central journal article supplement (PMC9832835; doi:10.15252/emmm.202216218), 2022-12-12
Supplement: EMMM-15-e16218-s002.pdf [file EMMM-15-e16218-s002.pdf]

## Expanded View Figures

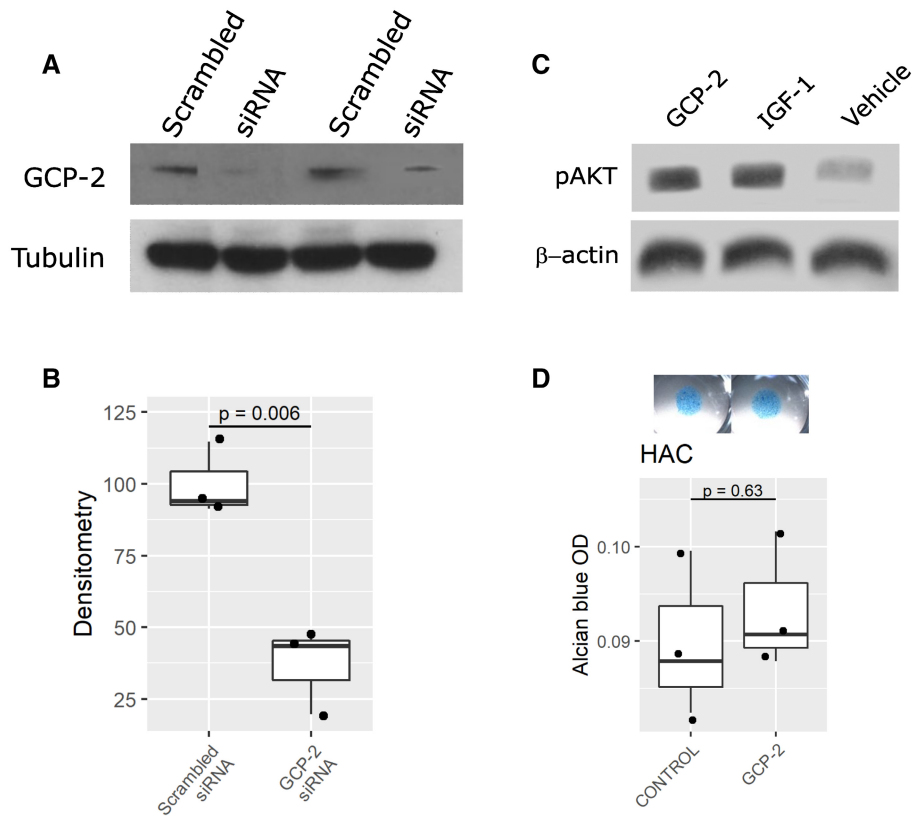

**Figure EV1. siRNA validation *in vitro*. Effect of GCP-2 on AKT phosphorylation in chondrocytes and on GAG production in HACs.**

- A, B C28/12 (A) or C3H10T1/2 (B) monolayers transfected with 25 nM of either scrambled or GCP-2 siRNA for 72 h and analyzed for GCP-2 levels by Western blotting. (A) A representative western blot; (B) densitometric quantification of three independent experiments.  $N = 3$ .  $P$ -values were determined using the two-tailed Student's  $t$ -test.
- C C28/12 micromasses stimulated for 3 days with recombinant GCP-2, IGF-1 (positive control) or untreated (vehicle) and assessed for AKT phosphorylation levels by Western blotting;  $\beta$ -actin as loading control; GCP-2—WT, GCP-2-treated samples, IGF-1—IGF-1-treated samples, V—vehicle-treated samples, pAKT—phosphorylated AKT.
- D Alcian blue staining and spectrophotometric quantitation of GAGs in micromasses of HACs treated with recombinant GCP-2 or vehicle ( $n = 3$ );  $P$ -values were determined by unpaired, two-tailed Student's  $t$ -test. OD—optical density.

Source data are available online for this figure.

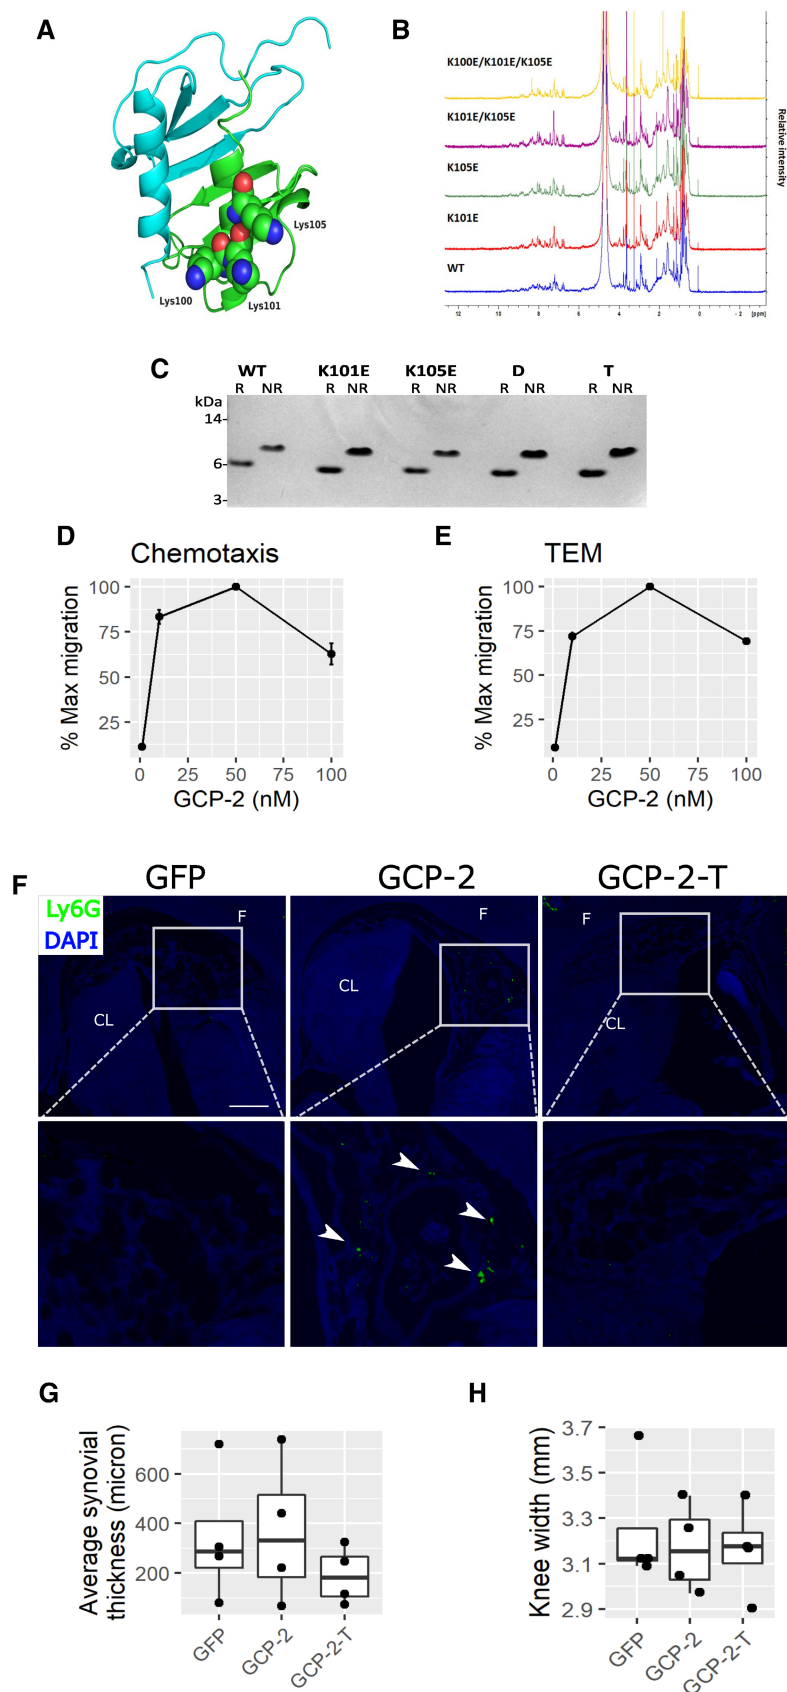

**Figure EV2. GCP-2 model and characterization of WT and mutants.**

- A** 3D homology model of human CXCL5 dimer (PDB: 2MGS) generated using SWISS-MODEL. The GCP-2 monomers are colored blue and green with Lys100, Lys101 and Lys105 shown in space filling representation for the latter.
- B** Comparison of 1D NMR spectra of WT and mutant GCP-2 proteins (all human) made in this study.
- C** SDS-PAGE analysis of GCP-2 WT and mutants under reducing (R) and non-reducing (NR) conditions. Protein samples (1  $\mu$ g) were either reduced and alkylated (R) or alkylated (NR). MW size from protein markers is displayed on the left. WT—wild-type GCP-2; K101E—K101E GCP-2\_single mutant; K105E—K105E GCP-2\_single mutant; D—K101E\_K105E GCP-2\_double mutant; T—K100E\_K101E\_K105E GCP-2\_triple mutant.
- D, E** Dose-dependency of WT GCP-2-induced (D) chemotaxis and (E) transendothelial migration (TEM) of CXCR2-expressing 300-19 pre-B cell line (mean values  $\pm$  SEM).  $N = 4$ .
- F** Representative images of immunostaining for the Ly6G neutrophil marker in the intercondylar notch of mice injected intra-articularly with GFP, GCP-2, or GCP-2-T adenovirus. Time point: 2 days. White arrowheads indicate neutrophils. Scale bar—50  $\mu$ m. F—femur; CL—cruciate ligament.
- G** Average thickness of the synovial membrane 4 days after the intra-articular injection of adenovirus encoding GFP, GCP-2 or GCP-2-T. The thickness of the synovial membrane was assessed by histomorphometry using ImageJ.  $P$ -values were determined with ANOVA  $n = 4$  per group.
- H** Caliper measurement of knee size 4 days after the injection of GFP, GCP-2 and GCP-2-T adenovirus;  $P$ -values were determined by one-way ANOVA ( $n = 4$ ).

Source data are available online for this figure.

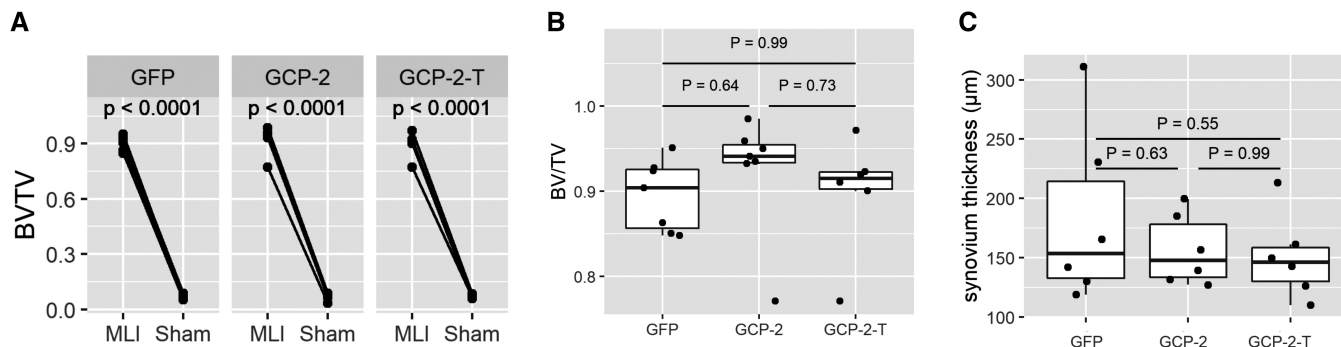

**Figure EV3. Exogenous GCP-2-T does not affect subchondral bone density and synovium thickness in osteoarthritis.**

- A Bone density of subchondral bone in operated and sham-operated knees as accessed by microCT as BV/TV; *P*-values were determined by fitting a mixed-effect model followed by pairwise comparison of the estimated marginal means ( $n = 14$  for the GFP and GCP-2 group and 12 for GCP-2-T).
- B Density of subchondral bone in different treatments as accessed by microCT as BV/TV; GFP ( $n = 7$ ), GCP-2 ( $n = 7$ ) and GCP-2-T ( $n = 6$ ); *P*-values were determined by ANOVA with Tukey's HSD *post hoc* test.
- C Synovium thickness in  $\mu\text{m}$  assessed as average thickness of synovium in six areas of the joint; GFP ( $n = 7$ ), GCP-2 ( $n = 7$ ) and GCP-2-T ( $n = 7$ ); *P*-values were determined by ANOVA with Tukey's HSD *post hoc* test.

Source data are available online for this figure.

**Figure EV4. GCP-2-T activates AKT phosphorylation *in vivo*—molecular characterization of osteoarthritis in mice.**

- A Ten-week-old female mice were injected intra-articularly with 6  $\mu\text{l}$  of GFP ( $n = 4$ ), GCP-2 ( $n = 3$ ) or GCP-2-T ( $n = 3$ ) adenovirus and killed 4 days later for immunofluorescence analysis of phospho-AKT (pAKT). After thresholding, pAKT<sup>+</sup> cells were counted using ImageJ. *P*-values were obtained by fitting a generalized linear model (family = Poisson) followed by pairwise comparison of the estimated marginal means.
- B–E Sections from the MLI experiment in Fig 5 were used to assess the expression of (B) collagen type II (Col2) ( $n = 4$  for GFP and 3 for GCP-2 and GCP-2-T), (C) collagen type X (Col10) ( $n = 3$  for GFP and 4 for GCP-2 and GCP-2-T), (D) NITEGE neo-epitope ( $n = 6$  for GFP,  $n = 2$  for GCP-2 and  $n = 4$  for GCP-2-T) using immunofluorescence, and (E) apoptosis using the TUNEL assay ( $n = 3$  for GFP and  $n = 4$  for GCP-2-T); *P*-values were obtained by fitting a generalized linear model. Whenever multiple technical replicates from the same knee were available, individual values were averaged. Scale bar = 50  $\mu\text{m}$ .

Source data are available online for this figure.

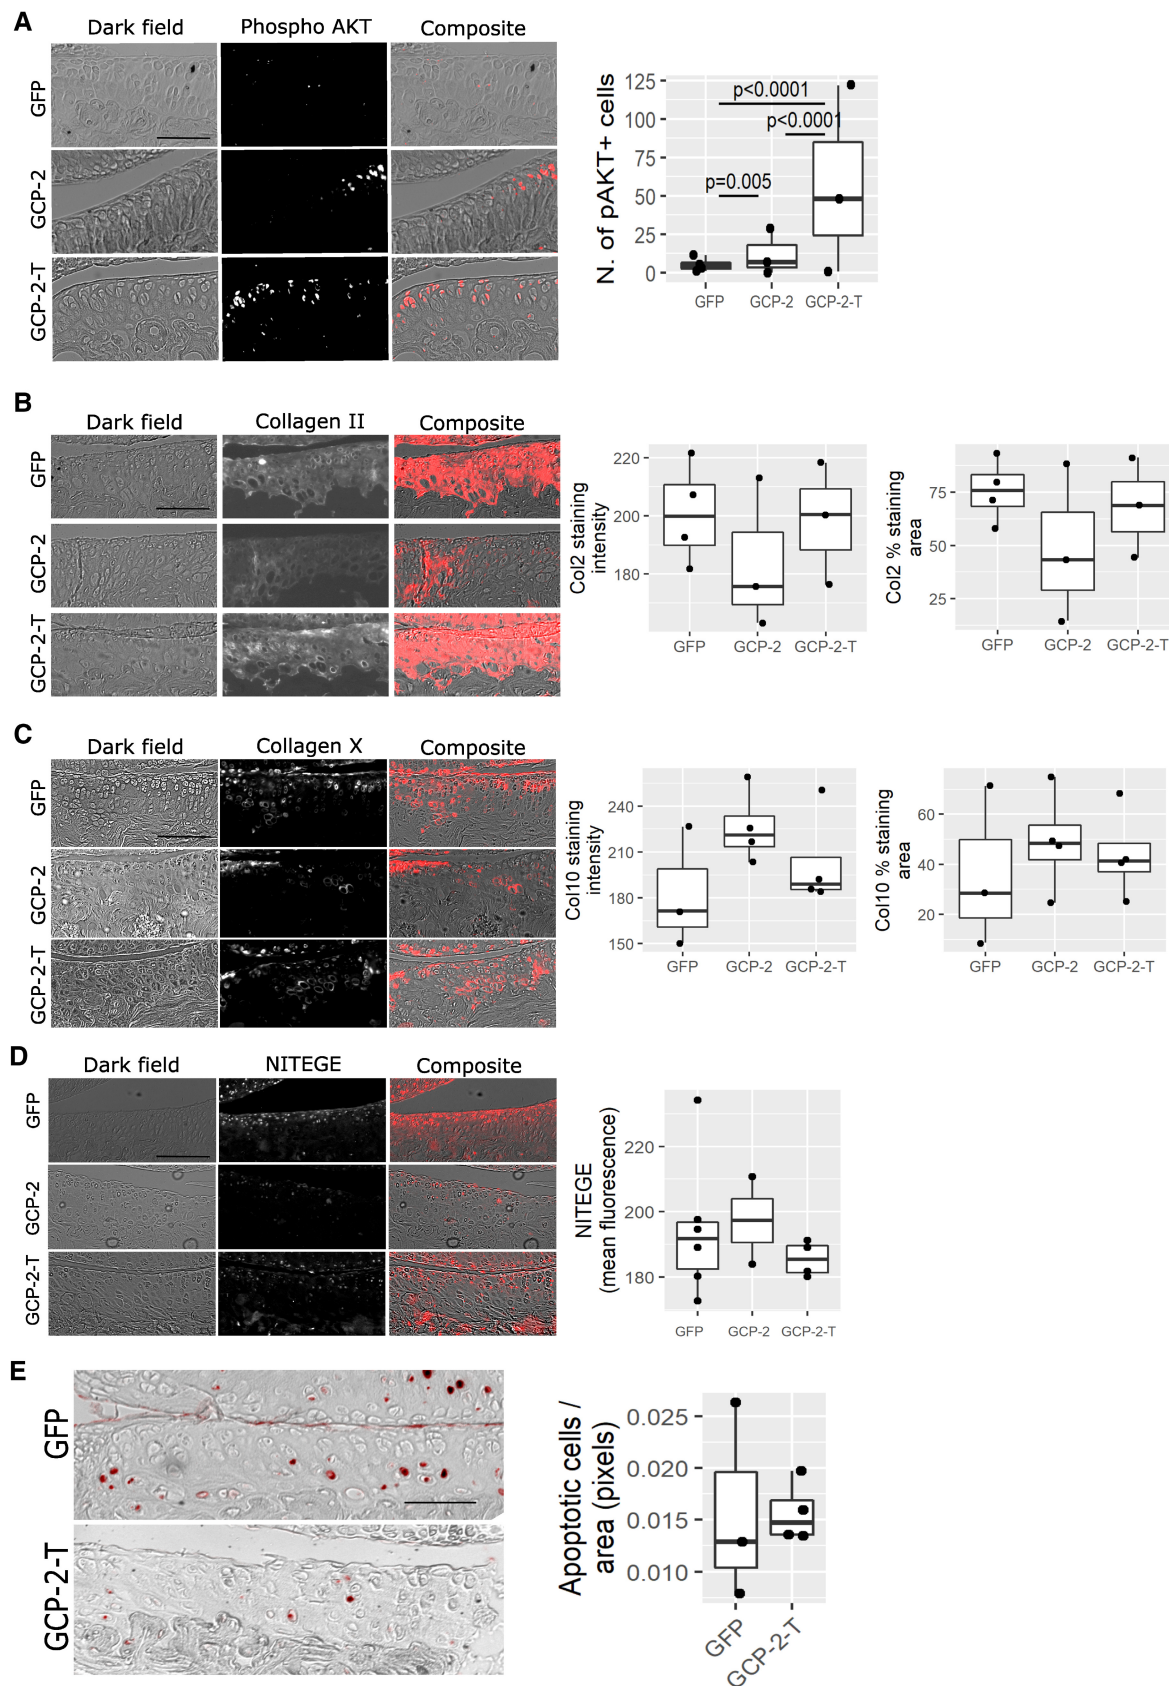

Figure EV4.
